# Supplementary material for: Cyclodextrin Formulation of the Marine Natural Product Pseudopterosin A Uncovers Optimal Pharmacodynamics in Proliferation Studies of Human Umbilical Vein Endothelial Cells
Source: MDPI journal article supplement (doi:10.3390/md11093258), 2013-08-26
Supplement: s1 [file s1]

marinedrugs-11-03258-s001.mol
  corina  12171321563D 1   1.00000     0.00000 
CORINA 3.49 0023  12.04.2013
 32 35  0  0  0  0  0  0  0  0999 V2000
    1.4883    1.1773    0.5462 C   0  0  0  0  0  0  0  0  0  0  0  0
    1.2027   -0.2950    0.2724 C   0  0  0  0  0  0  0  0  0  0  0  0
    1.6599   -1.1312    1.4390 C   0  0  0  0  0  0  0  0  0  0  0  0
    2.9429   -0.8719    1.9116 C   0  0  0  0  0  0  0  0  0  0  0  0
    3.7364    0.1912    1.1975 C   0  0  0  0  0  0  0  0  0  0  0  0
    2.8906    1.4487    1.0512 C   0  0  0  0  0  0  0  0  0  0  0  0
   -0.3002   -0.4756    0.0468 C   0  0  0  0  0  0  0  0  0  0  0  0
   -0.6370   -1.9690    0.0804 C   0  0  0  0  0  0  0  0  0  0  0  0
   -0.4742   -2.4687    1.5171 C   0  0  0  0  0  0  0  0  0  0  0  0
    0.9024   -2.1174    2.0212 C   0  0  0  0  0  0  0  0  0  0  0  0
    1.4052   -2.8203    3.1082 C   0  0  0  0  0  0  0  0  0  0  0  0
    2.6712   -2.5482    3.5963 C   0  0  0  0  0  0  0  0  0  0  0  0
    3.4510   -1.5661    2.9877 C   0  0  0  0  0  0  0  0  0  0  0  0
    4.1372   -0.3173   -0.1887 C   0  0  0  0  0  0  0  0  0  0  0  0
    0.5653   -3.8873    3.7617 C   0  0  0  0  0  0  0  0  0  0  0  0
   -0.6864    0.1053   -1.3150 C   0  0  0  0  0  0  0  0  0  0  0  0
    1.7364   -0.6056   -0.6258 H   0  0  0  0  0  0  0  0  0  0  0  0
   -2.6098   -3.9927    2.5541 C   0  0  0  0  0  0  0  0  0  0  0  0
   -2.4620   -2.5416    2.9330 C   0  0  0  0  0  0  0  0  0  0  0  0
   -1.5115   -1.8179    2.3954 C   0  0  0  0  0  0  0  0  0  0  0  0
   -3.4075   -1.9231    3.9302 C   0  0  0  0  0  0  0  0  0  0  0  0
    3.1527   -3.2362    4.6660 O   0  0  0  0  0  0  0  0  0  0  0  0
    4.7010   -1.2967    3.4507 O   0  0  0  0  0  0  0  0  0  0  0  0
    5.7787   -2.0412    2.8796 C   0  0  0  0  0  0  0  0  0  0  0  0
    7.1084   -1.5179    3.4291 C   0  0  0  0  0  0  0  0  0  0  0  0
    8.2542   -2.3595    2.8590 C   0  0  0  0  0  0  0  0  0  0  0  0
    8.0176   -3.8309    3.2133 C   0  0  0  0  0  0  0  0  0  0  0  0
    6.6529   -4.2649    2.6721 C   0  0  0  0  0  0  0  0  0  0  0  0
    5.6357   -3.4223    3.2177 O   0  0  0  0  0  0  0  0  0  0  0  0
    9.0422   -4.6345    2.6247 O   0  0  0  0  0  0  0  0  0  0  0  0
    8.2958   -2.2106    1.4384 O   0  0  0  0  0  0  0  0  0  0  0  0
    7.2805   -0.1528    3.0429 O   0  0  0  0  0  0  0  0  0  0  0  0
  1  2  1  0      
  2  3  1  0      
  3  4  2  0      
  4  5  1  0      
  5  6  1  0      
  6  1  1  0      
  2  7  1  0      
  7  8  1  0      
  8  9  1  0      
  9 10  1  0      
 10  3  1  0      
 10 11  2  0      
 11 12  1  0      
 12 13  2  0      
 13  4  1  0      
  5 14  1  0      
 11 15  1  0      
  7 16  1  0      
  2 17  1  0      
 18 19  1  0      
 19 20  2  0      
 19 21  1  0      
  9 20  1  0      
 12 22  1  0      
 23 13  1  0      
 23 24  1  0      
 24 25  1  0      
 25 26  1  0      
 26 27  1  0      
 27 28  1  0      
 28 29  1  0      
 29 24  1  0      
 27 30  1  0      
 26 31  1  0      
 25 32  1  0      
M  END
$$$$
