# Supplementary material for: Cyclodextrin Formulation of the Marine Natural Product Pseudopterosin A Uncovers Optimal Pharmacodynamics in Proliferation Studies of Human Umbilical Vein Endothelial Cells
Source: MDPI journal article supplement (doi:10.3390/md11093258), 2013-08-26
Supplement: s2 [file s2]

marinedrugs-11-03258-s001.mol
  ChemDraw12021317132D

 32 35  0  0  0  0  0  0  0  0999 V2000
   -2.3469    2.0625    0.0000 C   0  0  0  0  0  0  0  0  0  0  0  0
   -2.3469    1.2375    0.0000 C   0  0  0  0  0  0  0  0  0  0  0  0
   -1.6325    0.8250    0.0000 C   0  0  0  0  0  0  0  0  0  0  0  0
   -0.9180    1.2375    0.0000 C   0  0  0  0  0  0  0  0  0  0  0  0
   -0.9180    2.0625    0.0000 C   0  0  0  0  0  0  0  0  0  0  0  0
   -1.6325    2.4750    0.0000 C   0  0  0  0  0  0  0  0  0  0  0  0
   -3.0614    0.8250    0.0000 C   0  0  0  0  0  0  0  0  0  0  0  0
   -3.0614    0.0000    0.0000 C   0  0  0  0  0  0  0  0  0  0  0  0
   -2.3469   -0.4125    0.0000 C   0  0  0  0  0  0  0  0  0  0  0  0
   -1.6325    0.0000    0.0000 C   0  0  0  0  0  0  0  0  0  0  0  0
   -0.9180   -0.4125    0.0000 C   0  0  0  0  0  0  0  0  0  0  0  0
   -0.2035    0.0000    0.0000 C   0  0  0  0  0  0  0  0  0  0  0  0
   -0.2035    0.8250    0.0000 C   0  0  0  0  0  0  0  0  0  0  0  0
   -0.2035    2.4750    0.0000 C   0  0  0  0  0  0  0  0  0  0  0  0
   -0.9180   -1.2375    0.0000 C   0  0  0  0  0  0  0  0  0  0  0  0
   -3.7759    1.2375    0.0000 C   0  0  0  0  0  0  0  0  0  0  0  0
   -3.0614    1.6500    0.0000 H   0  0  0  0  0  0  0  0  0  0  0  0
   -3.7759   -1.2375    0.0000 C   0  0  0  0  0  0  0  0  0  0  0  0
   -3.0614   -1.6500    0.0000 C   0  0  0  0  0  0  0  0  0  0  0  0
   -2.3469   -1.2375    0.0000 C   0  0  0  0  0  0  0  0  0  0  0  0
   -3.0614   -2.4750    0.0000 C   0  0  0  0  0  0  0  0  0  0  0  0
    0.3798   -0.5834    0.0000 O   0  0  0  0  0  0  0  0  0  0  0  0
    0.3798    1.4084    0.0000 O   0  0  0  0  0  0  0  0  0  0  0  0
    1.2048    1.4084    0.0000 C   0  0  0  0  0  0  0  0  0  0  0  0
    1.4184    0.6115    0.0000 C   0  0  0  0  0  0  0  0  0  0  0  0
    2.2434    0.6115    0.0000 C   0  0  0  0  0  0  0  0  0  0  0  0
    2.9509    0.1871    0.0000 C   0  0  0  0  0  0  0  0  0  0  0  0
    2.7374    0.9840    0.0000 C   0  0  0  0  0  0  0  0  0  0  0  0
    1.9124    0.9840    0.0000 O   0  0  0  0  0  0  0  0  0  0  0  0
    3.7759    0.1871    0.0000 O   0  0  0  0  0  0  0  0  0  0  0  0
    2.4569   -0.1854    0.0000 O   0  0  0  0  0  0  0  0  0  0  0  0
    0.6215    0.8250    0.0000 O   0  0  0  0  0  0  0  0  0  0  0  0
  1  2  1  0      
  2  3  1  0      
  3  4  2  0      
  4  5  1  0      
  5  6  1  0      
  6  1  1  0      
  2  7  1  0      
  7  8  1  0      
  8  9  1  0      
  9 10  1  0      
 10  3  1  0      
 10 11  2  0      
 11 12  1  0      
 12 13  2  0      
 13  4  1  0      
  5 14  1  6      
 11 15  1  0      
  7 16  1  6      
  2 17  1  6      
 18 19  1  0      
 19 20  2  0      
 19 21  1  0      
  9 20  1  1      
 12 22  1  0      
 23 13  1  0      
 23 24  1  0      
 24 25  1  0      
 25 26  1  0      
 26 27  1  0      
 27 28  1  0      
 28 29  1  0      
 29 24  1  0      
 27 30  1  0      
 26 31  1  0      
 25 32  1  0      
M  END
