# Supplementary material for: Cyclodextrin Formulation of the Marine Natural Product Pseudopterosin A Uncovers Optimal Pharmacodynamics in Proliferation Studies of Human Umbilical Vein Endothelial Cells
Source: MDPI journal article supplement (doi:10.3390/md11093258), 2013-08-26
Supplement: s3 [file s3]

marinedrugs-11-03258-s002.mol
  corina  12171321563D 1   1.00000     0.00000 
CORINA 3.49 0023  12.04.2013
 33 37  0  0  0  0  0  0  0  0999 V2000
   -0.3532   -0.8453    0.6024 C   0  0  0  0  0  0  0  0  0  0  0  0
    0.0089   -2.2975    0.7784 C   0  0  0  0  0  0  0  0  0  0  0  0
    0.7977   -2.6617    1.7588 C   0  0  0  0  0  0  0  0  0  0  0  0
    1.3430   -1.6285    2.7107 C   0  0  0  0  0  0  0  0  0  0  0  0
    0.7322   -1.8290    4.1030 C   0  0  0  0  0  0  0  0  0  0  0  0
    2.8431   -1.7926    2.8443 C   0  0  0  0  0  0  0  0  0  0  0  0
    3.4871   -1.3953    4.0865 C   0  0  0  0  0  0  0  0  0  0  0  0
    2.7257   -0.7562    5.2142 C   0  0  0  0  0  0  0  0  0  0  0  0
    1.2300   -0.7186    5.0221 C   0  0  0  0  0  0  0  0  0  0  0  0
    4.7978   -1.6058    4.2949 C   0  0  0  0  0  0  0  0  0  0  0  0
    5.4687   -1.2187    5.5729 C   0  0  0  0  0  0  0  0  0  0  0  0
    4.5817   -1.1816    6.7981 C   0  0  0  0  0  0  0  0  0  0  0  0
    3.1204   -1.4991    6.4948 C   0  0  0  0  0  0  0  0  0  0  0  0
    3.5275   -2.3147    1.7972 C   0  0  0  0  0  0  0  0  0  0  0  0
    4.9158   -2.5457    1.8805 C   0  0  0  0  0  0  0  0  0  0  0  0
    5.6052   -2.2269    3.1818 C   0  0  0  0  0  0  0  0  0  0  0  0
   -0.5363   -3.3308   -0.1735 C   0  0  0  0  0  0  0  0  0  0  0  0
    2.7935   -2.6536    0.5254 C   0  0  0  0  0  0  0  0  0  0  0  0
    0.8419    0.6334    4.4203 C   0  0  0  0  0  0  0  0  0  0  0  0
    6.0863    0.1688    5.3875 C   0  0  0  0  0  0  0  0  0  0  0  0
    3.0777    0.2702    5.3166 H   0  0  0  0  0  0  0  0  0  0  0  0
    5.5360   -2.9870    0.9339 O   0  0  0  0  0  0  0  0  0  0  0  0
    6.6916   -1.3291    2.8857 O   0  0  0  0  0  0  0  0  0  0  0  0
    7.6962   -2.2213    2.3543 C   0  0  0  0  0  0  0  0  0  0  0  0
    7.5481   -3.4815    3.1982 C   0  0  0  0  0  0  0  0  0  0  0  0
    8.4724   -3.5292    4.4032 C   0  0  0  0  0  0  0  0  0  0  0  0
    9.8585   -2.9835    4.0784 C   0  0  0  0  0  0  0  0  0  0  0  0
    9.7021   -1.5588    3.5335 C   0  0  0  0  0  0  0  0  0  0  0  0
    8.9642   -1.6298    2.3182 O   0  0  0  0  0  0  0  0  0  0  0  0
    6.1834   -3.4376    3.6823 O   0  0  0  0  0  0  0  0  0  0  0  0
   10.6566   -2.9606    5.2635 O   0  0  0  0  0  0  0  0  0  0  0  0
    8.9464   -0.6976    4.5476 C   0  0  0  0  0  0  0  0  0  0  0  0
    7.9020   -2.7520    5.4581 O   0  0  0  0  0  0  0  0  0  0  0  0
  1  2  1  0      
  2  3  2  0      
  4  5  1  0      
  4  6  1  0      
  6  7  1  0      
  7  8  1  0      
  8  9  1  0      
  9  5  1  0      
  7 10  2  0      
 10 11  1  0      
 11 12  1  0      
 12 13  1  0      
 13  8  1  0      
  6 14  2  0      
 14 15  1  0      
 15 16  1  0      
 16 10  1  0      
  2 17  1  0      
  4  3  1  0      
 14 18  1  0      
  9 19  1  0      
 11 20  1  0      
  8 21  1  0      
 15 22  2  0      
 16 23  1  0      
 24 23  1  0      
 24 25  1  0      
 25 26  1  0      
 26 27  1  0      
 27 28  1  0      
 28 29  1  0      
 29 24  1  0      
 25 30  1  0      
 16 30  1  0      
 27 31  1  0      
 28 32  1  0      
 26 33  1  0      
M  END
$$$$
