# Supplementary material for: Cyclodextrin Formulation of the Marine Natural Product Pseudopterosin A Uncovers Optimal Pharmacodynamics in Proliferation Studies of Human Umbilical Vein Endothelial Cells
Source: MDPI journal article supplement (doi:10.3390/md11093258), 2013-08-26
Supplement: s5 [file s5]

marinedrugs-11-03258-s003.mol
  corina  12171321563D 1   1.00000     0.00000 
CORINA 3.49 0023  12.04.2013
 27 29  0  0  0  0  0  0  0  0999 V2000
    3.9111   -1.1832    0.7357 C   0  0  0  0  0  0  0  0  0  0  0  0
    4.9685   -0.9535    1.7846 C   0  0  0  0  0  0  0  0  0  0  0  0
    4.6838   -0.2645    2.8618 C   0  0  0  0  0  0  0  0  0  0  0  0
    3.2988    0.2984    3.0520 C   0  0  0  0  0  0  0  0  0  0  0  0
    2.7330   -0.1807    4.3904 C   0  0  0  0  0  0  0  0  0  0  0  0
   -1.4935    0.2780    4.8257 C   0  0  0  0  0  0  0  0  0  0  0  0
   -0.7164    0.2761    5.9771 C   0  0  0  0  0  0  0  0  0  0  0  0
    0.7113   -0.1896    5.8584 C   0  0  0  0  0  0  0  0  0  0  0  0
    1.3270    0.3907    4.5836 C   0  0  0  0  0  0  0  0  0  0  0  0
   -1.2642    0.6877    7.1705 C   0  0  0  0  0  0  0  0  0  0  0  0
   -0.4786    0.7206    8.4552 C   0  0  0  0  0  0  0  0  0  0  0  0
    0.7777   -0.1402    8.3390 C   0  0  0  0  0  0  0  0  0  0  0  0
    1.5276    0.2681    7.0654 C   0  0  0  0  0  0  0  0  0  0  0  0
   -2.8108    0.6872    4.8663 C   0  0  0  0  0  0  0  0  0  0  0  0
   -3.3662    1.0978    6.0626 C   0  0  0  0  0  0  0  0  0  0  0  0
   -2.5954    1.0978    7.2129 C   0  0  0  0  0  0  0  0  0  0  0  0
    6.3534   -1.5163    1.5943 C   0  0  0  0  0  0  0  0  0  0  0  0
   -3.1407    1.5000    8.3910 O   0  0  0  0  0  0  0  0  0  0  0  0
   -4.5101    1.9076    8.3664 C   0  0  0  0  0  0  0  0  0  0  0  0
   -4.9804    2.2036    9.7929 C   0  0  0  0  0  0  0  0  0  0  0  0
   -6.4299    2.6972    9.7522 C   0  0  0  0  0  0  0  0  0  0  0  0
   -6.5129    3.9289    8.8454 C   0  0  0  0  0  0  0  0  0  0  0  0
   -5.9834    3.5663    7.4555 C   0  0  0  0  0  0  0  0  0  0  0  0
   -4.6424    3.0858    7.5685 O   0  0  0  0  0  0  0  0  0  0  0  0
   -4.9036    1.0120   10.5779 O   0  0  0  0  0  0  0  0  0  0  0  0
   -7.2720    1.6651    9.2349 O   0  0  0  0  0  0  0  0  0  0  0  0
   -7.8730    4.3550    8.7420 O   0  0  0  0  0  0  0  0  0  0  0  0
  1  2  1  0      
  2  3  2  0      
  4  5  1  0      
  6  7  2  0      
  7  8  1  0      
  8  9  1  0      
  9  5  1  0      
  7 10  1  0      
 10 11  1  0      
 11 12  1  0      
 12 13  1  0      
 13  8  1  0      
  6 14  1  0      
 14 15  2  0      
 15 16  1  0      
 16 10  2  0      
  2 17  1  0      
  4  3  1  0      
 16 18  1  0      
 18 19  1  0      
 19 20  1  0      
 20 21  1  0      
 21 22  1  0      
 22 23  1  0      
 23 24  1  0      
 24 19  1  0      
 20 25  1  0      
 21 26  1  0      
 22 27  1  0      
M  END
$$$$
