# Supplementary material for: Cyclodextrin Formulation of the Marine Natural Product Pseudopterosin A Uncovers Optimal Pharmacodynamics in Proliferation Studies of Human Umbilical Vein Endothelial Cells
Source: MDPI journal article supplement (doi:10.3390/md11093258), 2013-08-26
Supplement: s6 [file s6]

marinedrugs-11-03258-s003.mol
  ChemDraw12021317152D

 27 29  0  0  0  0  0  0  0  0999 V2000
   -3.2933    1.6802    0.0000 C   0  0  0  0  0  0  0  0  0  0  0  0
   -3.2933    0.8552    0.0000 C   0  0  0  0  0  0  0  0  0  0  0  0
   -2.5788    0.4427    0.0000 C   0  0  0  0  0  0  0  0  0  0  0  0
   -1.8644    0.8552    0.0000 C   0  0  0  0  0  0  0  0  0  0  0  0
   -1.8644    1.6802    0.0000 C   0  0  0  0  0  0  0  0  0  0  0  0
   -1.1499    0.4427    0.0000 C   0  0  0  0  0  0  0  0  0  0  0  0
   -0.4354    0.8552    0.0000 C   0  0  0  0  0  0  0  0  0  0  0  0
   -0.4354    1.6802    0.0000 C   0  0  0  0  0  0  0  0  0  0  0  0
   -1.1499    2.0927    0.0000 C   0  0  0  0  0  0  0  0  0  0  0  0
    0.2791    0.4427    0.0000 C   0  0  0  0  0  0  0  0  0  0  0  0
    0.9935    0.8552    0.0000 C   0  0  0  0  0  0  0  0  0  0  0  0
    0.9935    1.6802    0.0000 C   0  0  0  0  0  0  0  0  0  0  0  0
    0.2791    2.0927    0.0000 C   0  0  0  0  0  0  0  0  0  0  0  0
   -1.1499   -0.3823    0.0000 C   0  0  0  0  0  0  0  0  0  0  0  0
   -0.4354   -0.7948    0.0000 C   0  0  0  0  0  0  0  0  0  0  0  0
    0.2791   -0.3823    0.0000 C   0  0  0  0  0  0  0  0  0  0  0  0
   -4.0078    0.4427    0.0000 C   0  0  0  0  0  0  0  0  0  0  0  0
    0.9935   -0.7948    0.0000 O   0  0  0  0  0  0  0  0  0  0  0  0
    1.7904   -0.5813    0.0000 C   0  0  0  0  0  0  0  0  0  0  0  0
    2.2029   -1.2958    0.0000 C   0  0  0  0  0  0  0  0  0  0  0  0
    3.0010   -1.0867    0.0000 C   0  0  0  0  0  0  0  0  0  0  0  0
    3.7942   -1.2958    0.0000 C   0  0  0  0  0  0  0  0  0  0  0  0
    3.3818   -0.5813    0.0000 C   0  0  0  0  0  0  0  0  0  0  0  0
    2.5837   -0.7903    0.0000 O   0  0  0  0  0  0  0  0  0  0  0  0
    1.3779   -1.2958    0.0000 O   0  0  0  0  0  0  0  0  0  0  0  0
    3.2145   -1.8836    0.0000 O   0  0  0  0  0  0  0  0  0  0  0  0
    4.0078   -2.0927    0.0000 O   0  0  0  0  0  0  0  0  0  0  0  0
  1  2  1  0      
  2  3  2  0      
  4  5  1  0      
  6  7  2  0      
  7  8  1  0      
  8  9  1  0      
  9  5  1  0      
  7 10  1  0      
 10 11  1  0      
 11 12  1  0      
 12 13  1  0      
 13  8  1  0      
  6 14  1  0      
 14 15  2  0      
 15 16  1  0      
 16 10  2  0      
  2 17  1  0      
  4  3  1  1      
 16 18  1  0      
 18 19  1  0      
 19 20  1  0      
 20 21  1  0      
 21 22  1  0      
 22 23  1  0      
 23 24  1  0      
 24 19  1  0      
 20 25  1  0      
 21 26  1  0      
 22 27  1  0      
M  END
