# Supplementary material for: Cyclodextrin Formulation of the Marine Natural Product Pseudopterosin A Uncovers Optimal Pharmacodynamics in Proliferation Studies of Human Umbilical Vein Endothelial Cells
Source: MDPI journal article supplement (doi:10.3390/md11093258), 2013-08-26
Supplement: s7 [file s7]

marinedrugs-11-03258-s004.mol
  corina  12171321563D 1   1.00000     0.00000 
CORINA 3.49 0023  12.04.2013
 33 36  0  0  0  0  0  0  0  0999 V2000
   -1.6608    0.2310   -0.7635 C   0  0  0  0  0  0  0  0  0  0  0  0
   -1.2464   -1.2004   -0.4413 C   0  0  0  0  0  0  0  0  0  0  0  0
   -0.0185   -1.1942    0.4312 C   0  0  0  0  0  0  0  0  0  0  0  0
    1.0248   -0.3729    0.0130 C   0  0  0  0  0  0  0  0  0  0  0  0
    0.8233    0.3959   -1.2668 C   0  0  0  0  0  0  0  0  0  0  0  0
   -0.5192    1.1130   -1.2265 C   0  0  0  0  0  0  0  0  0  0  0  0
   -2.4025   -1.9026    0.2745 C   0  0  0  0  0  0  0  0  0  0  0  0
   -1.8973   -3.2186    0.8725 C   0  0  0  0  0  0  0  0  0  0  0  0
   -0.9605   -2.8919    2.0369 C   0  0  0  0  0  0  0  0  0  0  0  0
    0.1206   -1.9521    1.5672 C   0  0  0  0  0  0  0  0  0  0  0  0
    1.2860   -1.8606    2.3176 C   0  0  0  0  0  0  0  0  0  0  0  0
    2.3154   -1.0272    1.9178 C   0  0  0  0  0  0  0  0  0  0  0  0
    2.1849   -0.2780    0.7492 C   0  0  0  0  0  0  0  0  0  0  0  0
   -1.5147   -4.3162    4.4079 C   0  0  0  0  0  0  0  0  0  0  0  0
   -1.9438   -2.8781    4.2717 C   0  0  0  0  0  0  0  0  0  0  0  0
   -1.7460   -2.2394    3.1451 C   0  0  0  0  0  0  0  0  0  0  0  0
    1.4303   -2.6760    3.5767 C   0  0  0  0  0  0  0  0  0  0  0  0
    3.1937    0.5368    0.3395 O   0  0  0  0  0  0  0  0  0  0  0  0
    0.8485   -0.5717   -2.4517 C   0  0  0  0  0  0  0  0  0  0  0  0
   -1.0282   -1.7306   -1.3683 H   0  0  0  0  0  0  0  0  0  0  0  0
   -3.5230   -2.1925   -0.7262 C   0  0  0  0  0  0  0  0  0  0  0  0
   -2.6004   -2.1746    5.4314 C   0  0  0  0  0  0  0  0  0  0  0  0
    3.2603    1.8353    0.9325 C   0  0  0  0  0  0  0  0  0  0  0  0
    4.5784    2.5084    0.5408 C   0  0  0  0  0  0  0  0  0  0  0  0
    4.6157    3.9218    1.1302 C   0  0  0  0  0  0  0  0  0  0  0  0
    3.3946    4.7023    0.6343 C   0  0  0  0  0  0  0  0  0  0  0  0
    2.1222    3.9444    1.0224 C   0  0  0  0  0  0  0  0  0  0  0  0
    2.1658    2.6280    0.4681 O   0  0  0  0  0  0  0  0  0  0  0  0
    4.5874    3.8457    2.5569 O   0  0  0  0  0  0  0  0  0  0  0  0
    3.3802    5.9987    1.2352 O   0  0  0  0  0  0  0  0  0  0  0  0
    5.6740    1.7479    1.0540 O   0  0  0  0  0  0  0  0  0  0  0  0
    3.4499   -0.9385    2.6624 O   0  0  0  0  0  0  0  0  0  0  0  0
    4.5422   -1.7781    2.2830 C   0  0  0  0  0  0  0  0  0  0  0  0
  1  2  1  0      
  2  3  1  0      
  3  4  1  0      
  4  5  1  0      
  5  6  1  0      
  6  1  1  0      
  2  7  1  0      
  7  8  1  0      
  8  9  1  0      
  9 10  1  0      
 10  3  2  0      
 10 11  1  0      
 11 12  2  0      
 12 13  1  0      
 13  4  2  0      
 14 15  1  0      
 15 16  2  0      
 17 11  1  0      
 18 13  1  0      
  5 19  1  0      
  2 20  1  0      
  7 21  1  0      
 15 22  1  0      
  9 16  1  0      
 18 23  1  0      
 23 24  1  0      
 24 25  1  0      
 25 26  1  0      
 26 27  1  0      
 27 28  1  0      
 28 23  1  0      
 25 29  1  0      
 26 30  1  0      
 24 31  1  0      
 12 32  1  0      
 32 33  1  0      
M  STY  1   1 SUP
M  SLB  1   1   1
M  SAL   1  2  32  33
M  SBL   1  1  35
M  SMT   1 OCH3
M  SBV   1 35   -4.1655   10.9038
M  END
$$$$
