# Supplementary material for: Cyclodextrin Formulation of the Marine Natural Product Pseudopterosin A Uncovers Optimal Pharmacodynamics in Proliferation Studies of Human Umbilical Vein Endothelial Cells
Source: MDPI journal article supplement (doi:10.3390/md11093258), 2013-08-26
Supplement: s8 [file s8]

marinedrugs-11-03258-s004.mol
  ChemDraw12021317162D

 33 36  0  0  0  0  0  0  0  0999 V2000
   -2.5273    2.0625    0.0000 C   0  0  0  0  0  0  0  0  0  0  0  0
   -2.5273    1.2375    0.0000 C   0  0  0  0  0  0  0  0  0  0  0  0
   -1.8129    0.8250    0.0000 C   0  0  0  0  0  0  0  0  0  0  0  0
   -1.0984    1.2375    0.0000 C   0  0  0  0  0  0  0  0  0  0  0  0
   -1.0984    2.0625    0.0000 C   0  0  0  0  0  0  0  0  0  0  0  0
   -1.8129    2.4750    0.0000 C   0  0  0  0  0  0  0  0  0  0  0  0
   -3.2418    0.8250    0.0000 C   0  0  0  0  0  0  0  0  0  0  0  0
   -3.2418    0.0000    0.0000 C   0  0  0  0  0  0  0  0  0  0  0  0
   -2.5273   -0.4125    0.0000 C   0  0  0  0  0  0  0  0  0  0  0  0
   -1.8129    0.0000    0.0000 C   0  0  0  0  0  0  0  0  0  0  0  0
   -1.0984   -0.4125    0.0000 C   0  0  0  0  0  0  0  0  0  0  0  0
   -0.3839    0.0000    0.0000 C   0  0  0  0  0  0  0  0  0  0  0  0
   -0.3839    0.8250    0.0000 C   0  0  0  0  0  0  0  0  0  0  0  0
   -3.9563   -1.2375    0.0000 C   0  0  0  0  0  0  0  0  0  0  0  0
   -3.2418   -1.6500    0.0000 C   0  0  0  0  0  0  0  0  0  0  0  0
   -2.5273   -1.2375    0.0000 C   0  0  0  0  0  0  0  0  0  0  0  0
   -1.0984   -1.2375    0.0000 C   0  0  0  0  0  0  0  0  0  0  0  0
    0.3306    1.2375    0.0000 O   0  0  0  0  0  0  0  0  0  0  0  0
   -0.3839    2.4750    0.0000 C   0  0  0  0  0  0  0  0  0  0  0  0
   -1.8129    1.6500    0.0000 H   0  0  0  0  0  0  0  0  0  0  0  0
   -3.9563    1.2375    0.0000 C   0  0  0  0  0  0  0  0  0  0  0  0
   -3.2418   -2.4750    0.0000 C   0  0  0  0  0  0  0  0  0  0  0  0
    1.1556    1.2375    0.0000 C   0  0  0  0  0  0  0  0  0  0  0  0
    1.5681    0.5230    0.0000 C   0  0  0  0  0  0  0  0  0  0  0  0
    2.3661    0.7321    0.0000 C   0  0  0  0  0  0  0  0  0  0  0  0
    3.1594    0.5230    0.0000 C   0  0  0  0  0  0  0  0  0  0  0  0
    2.7469    1.2375    0.0000 C   0  0  0  0  0  0  0  0  0  0  0  0
    1.9488    1.0285    0.0000 O   0  0  0  0  0  0  0  0  0  0  0  0
    2.7786    0.0177    0.0000 O   0  0  0  0  0  0  0  0  0  0  0  0
    3.9563    0.7366    0.0000 O   0  0  0  0  0  0  0  0  0  0  0  0
    0.7431    0.5230    0.0000 O   0  0  0  0  0  0  0  0  0  0  0  0
   -0.0278   -0.2062    0.0000 O   0  0  0  0  0  0  0  0  0  0  0  0
    0.6866   -0.6187    0.0000 C   0  0  0  0  0  0  0  0  0  0  0  0
  1  2  1  0      
  2  3  1  0      
  3  4  1  0      
  4  5  1  0      
  5  6  1  0      
  6  1  1  0      
  2  7  1  0      
  7  8  1  0      
  8  9  1  0      
  9 10  1  0      
 10  3  2  0      
 10 11  1  0      
 11 12  2  0      
 12 13  1  0      
 13  4  2  0      
 14 15  1  0      
 15 16  2  0      
 17 11  1  0      
 18 13  1  0      
  5 19  1  6      
  2 20  1  6      
  7 21  1  6      
 15 22  1  0      
  9 16  1  1      
 18 23  1  0      
 23 24  1  0      
 24 25  1  0      
 25 26  1  0      
 26 27  1  0      
 27 28  1  0      
 28 23  1  0      
 25 29  1  0      
 26 30  1  0      
 24 31  1  0      
 12 32  1  0      
 32 33  1  0      
M  STY  1   1 SUP
M  SLB  1   1   1
M  SAL   1  2  32  33
M  SBL   1  1  35
M  SMT   1 OCH3
M  SBV   1 35   -4.1655   10.9038
M  END
