# Supplementary material for: Cyclodextrin Formulation of the Marine Natural Product Pseudopterosin A Uncovers Optimal Pharmacodynamics in Proliferation Studies of Human Umbilical Vein Endothelial Cells
Source: MDPI journal article supplement (doi:10.3390/md11093258), 2013-08-26
Supplement: s9 [file s9]

marinedrugs-11-03258-s005.mol
  corina  12171321563D 1   1.00000     0.00000 
CORINA 3.49 0023  12.04.2013
 32 35  0  0  0  0  0  0  0  0999 V2000
    1.4911    1.1813    0.5469 C   0  0  0  0  0  0  0  0  0  0  0  0
    1.2052   -0.2909    0.2722 C   0  0  0  0  0  0  0  0  0  0  0  0
    1.6623   -1.1278    1.4382 C   0  0  0  0  0  0  0  0  0  0  0  0
    2.9459   -0.8688    1.9109 C   0  0  0  0  0  0  0  0  0  0  0  0
    3.7392    0.1946    1.1974 C   0  0  0  0  0  0  0  0  0  0  0  0
    2.8935    1.4522    1.0519 C   0  0  0  0  0  0  0  0  0  0  0  0
   -0.2977   -0.4710    0.0465 C   0  0  0  0  0  0  0  0  0  0  0  0
   -0.6348   -1.9643    0.0793 C   0  0  0  0  0  0  0  0  0  0  0  0
   -0.4717   -2.4649    1.5157 C   0  0  0  0  0  0  0  0  0  0  0  0
    0.9050   -2.1140    2.0198 C   0  0  0  0  0  0  0  0  0  0  0  0
    1.4081   -2.8178    3.1065 C   0  0  0  0  0  0  0  0  0  0  0  0
    2.6740   -2.5465    3.5942 C   0  0  0  0  0  0  0  0  0  0  0  0
    3.4538   -1.5635    2.9863 C   0  0  0  0  0  0  0  0  0  0  0  0
   -2.6074   -3.9893    2.5520 C   0  0  0  0  0  0  0  0  0  0  0  0
   -2.4593   -2.5384    2.9318 C   0  0  0  0  0  0  0  0  0  0  0  0
   -1.5088   -1.8145    2.3946 C   0  0  0  0  0  0  0  0  0  0  0  0
    0.5684   -3.8855    3.7592 C   0  0  0  0  0  0  0  0  0  0  0  0
    3.1555   -3.2352    4.6635 O   0  0  0  0  0  0  0  0  0  0  0  0
    4.7038   -1.2943    3.4495 O   0  0  0  0  0  0  0  0  0  0  0  0
    4.1399   -0.3131   -0.1892 C   0  0  0  0  0  0  0  0  0  0  0  0
    1.7388   -0.6009   -0.6263 H   0  0  0  0  0  0  0  0  0  0  0  0
   -0.6838    0.1106   -1.3149 C   0  0  0  0  0  0  0  0  0  0  0  0
   -3.4046   -1.9204    3.9295 C   0  0  0  0  0  0  0  0  0  0  0  0
    5.7817   -2.0382    2.8779 C   0  0  0  0  0  0  0  0  0  0  0  0
    7.1112   -1.5150    3.4277 C   0  0  0  0  0  0  0  0  0  0  0  0
    8.2572   -2.3560    2.8570 C   0  0  0  0  0  0  0  0  0  0  0  0
    8.0209   -3.8277    3.2102 C   0  0  0  0  0  0  0  0  0  0  0  0
    6.6562   -4.2615    2.6687 C   0  0  0  0  0  0  0  0  0  0  0  0
    5.6389   -3.4196    3.2149 O   0  0  0  0  0  0  0  0  0  0  0  0
    8.2988   -2.2060    1.4365 O   0  0  0  0  0  0  0  0  0  0  0  0
    9.0456   -4.6307    2.6211 O   0  0  0  0  0  0  0  0  0  0  0  0
    7.2831   -0.1497    3.0426 O   0  0  0  0  0  0  0  0  0  0  0  0
  1  2  1  0      
  2  3  1  0      
  3  4  1  0      
  4  5  1  0      
  5  6  1  0      
  6  1  1  0      
  2  7  1  0      
  7  8  1  0      
  8  9  1  0      
  9 10  1  0      
 10  3  2  0      
 10 11  1  0      
 11 12  2  0      
 12 13  1  0      
 13  4  2  0      
 14 15  1  0      
 15 16  2  0      
 17 11  1  0      
 12 18  1  0      
 19 13  1  0      
  5 20  1  0      
  2 21  1  0      
  7 22  1  0      
 15 23  1  0      
  9 16  1  0      
 19 24  1  0      
 24 25  1  0      
 25 26  1  0      
 26 27  1  0      
 27 28  1  0      
 28 29  1  0      
 29 24  1  0      
 26 30  1  0      
 27 31  1  0      
 25 32  1  0      
M  END
$$$$
