# Supplementary material for: Cyclodextrin Formulation of the Marine Natural Product Pseudopterosin A Uncovers Optimal Pharmacodynamics in Proliferation Studies of Human Umbilical Vein Endothelial Cells
Source: MDPI journal article supplement (doi:10.3390/md11093258), 2013-08-26
Supplement: s11 [file s11]

marinedrugs-11-03258-s006.mol
  corina  12171321563D 1   1.00000     0.00000 
CORINA 3.49 0023  12.04.2013
 33 36  0  0  0  0  0  0  0  0999 V2000
   -0.2970    0.7053   -0.3865 C   0  0  0  0  0  0  0  0  0  0  0  0
    0.1086   -0.6222    0.2562 C   0  0  0  0  0  0  0  0  0  0  0  0
    0.7824   -0.3564    1.5758 C   0  0  0  0  0  0  0  0  0  0  0  0
    1.4387    0.7774    1.7909 C   0  0  0  0  0  0  0  0  0  0  0  0
    1.5990    1.8611    0.7660 C   0  0  0  0  0  0  0  0  0  0  0  0
    0.9680    1.5427   -0.5751 C   0  0  0  0  0  0  0  0  0  0  0  0
   -1.1281   -1.4959    0.4548 C   0  0  0  0  0  0  0  0  0  0  0  0
   -0.7173   -2.7847    1.1729 C   0  0  0  0  0  0  0  0  0  0  0  0
   -0.3484   -2.4483    2.6173 C   0  0  0  0  0  0  0  0  0  0  0  0
    0.6964   -1.3646    2.6467 C   0  0  0  0  0  0  0  0  0  0  0  0
    1.5685   -1.3475    3.6520 C   0  0  0  0  0  0  0  0  0  0  0  0
    2.6310   -0.2812    3.7027 C   0  0  0  0  0  0  0  0  0  0  0  0
    2.0548    1.0226    3.1556 C   0  0  0  0  0  0  0  0  0  0  0  0
   -1.5698   -4.1047    4.5469 C   0  0  0  0  0  0  0  0  0  0  0  0
   -2.1019   -2.7175    4.2948 C   0  0  0  0  0  0  0  0  0  0  0  0
   -1.5779   -1.9766    3.3500 C   0  0  0  0  0  0  0  0  0  0  0  0
    1.4928   -2.3913    4.7363 C   0  0  0  0  0  0  0  0  0  0  0  0
    3.0930    2.1135    0.5537 C   0  0  0  0  0  0  0  0  0  0  0  0
    0.8022   -1.1439   -0.4032 H   0  0  0  0  0  0  0  0  0  0  0  0
   -1.7361   -1.8396   -0.9065 C   0  0  0  0  0  0  0  0  0  0  0  0
   -3.2367   -2.1825    5.1298 C   0  0  0  0  0  0  0  0  0  0  0  0
    3.0986    1.9916    3.0387 O   0  0  0  0  0  0  0  0  0  0  0  0
    3.0504   -0.0882    5.0550 O   0  0  0  0  0  0  0  0  0  0  0  0
    3.2835    2.7907    4.2089 C   0  0  0  0  0  0  0  0  0  0  0  0
    3.8361    1.9863    5.2528 O   0  0  0  0  0  0  0  0  0  0  0  0
    5.0907    1.3859    4.9248 C   0  0  0  0  0  0  0  0  0  0  0  0
    6.1202    2.4822    4.6386 C   0  0  0  0  0  0  0  0  0  0  0  0
    5.6059    3.3706    3.5017 C   0  0  0  0  0  0  0  0  0  0  0  0
    4.2404    3.9434    3.8939 C   0  0  0  0  0  0  0  0  0  0  0  0
    3.7177    4.7157    2.8112 O   0  0  0  0  0  0  0  0  0  0  0  0
    6.3141    3.2735    5.8126 O   0  0  0  0  0  0  0  0  0  0  0  0
    6.5264    4.4402    3.2770 O   0  0  0  0  0  0  0  0  0  0  0  0
    5.5695    0.5303    6.0994 C   0  0  0  0  0  0  0  0  0  0  0  0
  1  2  1  0      
  2  3  1  0      
  3  4  2  0      
  4  5  1  0      
  5  6  1  0      
  6  1  1  0      
  2  7  1  0      
  7  8  1  0      
  8  9  1  0      
  9 10  1  0      
 10  3  1  0      
 10 11  2  0      
 11 12  1  0      
 12 13  1  0      
 13  4  1  0      
 14 15  1  0      
 15 16  2  0      
 17 11  1  0      
  5 18  1  0      
  2 19  1  0      
  7 20  1  0      
 15 21  1  0      
  9 16  1  0      
 13 22  1  0      
 12 23  1  0      
 22 24  1  0      
 24 25  1  0      
 25 26  1  0      
 26 27  1  0      
 27 28  1  0      
 28 29  1  0      
 29 24  1  0      
 29 30  1  0      
 27 31  1  0      
 28 32  1  0      
 26 33  1  0      
M  END
$$$$
