# Supplementary material for: Cyclodextrin Formulation of the Marine Natural Product Pseudopterosin A Uncovers Optimal Pharmacodynamics in Proliferation Studies of Human Umbilical Vein Endothelial Cells
Source: MDPI journal article supplement (doi:10.3390/md11093258), 2013-08-26
Supplement: s13 [file s13]

marinedrugs-11-03258-s007.mol
  corina  12171321573D 1   1.00000     0.00000 
CORINA 3.49 0023  12.04.2013
 33 36  0  0  0  0  0  0  0  0999 V2000
   -0.3056    0.7197   -0.3521 C   0  0  0  0  0  0  0  0  0  0  0  0
    0.0918   -0.6140    0.2826 C   0  0  0  0  0  0  0  0  0  0  0  0
    0.7855   -0.3594    1.5941 C   0  0  0  0  0  0  0  0  0  0  0  0
    1.4582    0.7658    1.8032 C   0  0  0  0  0  0  0  0  0  0  0  0
    1.6188    1.8497    0.7787 C   0  0  0  0  0  0  0  0  0  0  0  0
    0.9671    1.5420   -0.5550 C   0  0  0  0  0  0  0  0  0  0  0  0
   -1.1528   -1.4730    0.4951 C   0  0  0  0  0  0  0  0  0  0  0  0
   -0.7489   -2.7684    1.2053 C   0  0  0  0  0  0  0  0  0  0  0  0
   -0.3576   -2.4396    2.6456 C   0  0  0  0  0  0  0  0  0  0  0  0
    0.7007   -1.3689    2.6640 C   0  0  0  0  0  0  0  0  0  0  0  0
    1.5856   -1.3646    3.6582 C   0  0  0  0  0  0  0  0  0  0  0  0
    2.6616   -0.3115    3.6976 C   0  0  0  0  0  0  0  0  0  0  0  0
    2.0945    1.0005    3.1605 C   0  0  0  0  0  0  0  0  0  0  0  0
   -1.5718   -4.0831    4.5909 C   0  0  0  0  0  0  0  0  0  0  0  0
   -2.0908   -2.6895    4.3470 C   0  0  0  0  0  0  0  0  0  0  0  0
   -1.5719   -1.9546    3.3948 C   0  0  0  0  0  0  0  0  0  0  0  0
    1.5108   -2.4098    4.7412 C   0  0  0  0  0  0  0  0  0  0  0  0
    3.1130    2.0843    0.5480 C   0  0  0  0  0  0  0  0  0  0  0  0
    0.7706   -1.1428   -0.3866 H   0  0  0  0  0  0  0  0  0  0  0  0
   -1.7822   -1.8063   -0.8591 C   0  0  0  0  0  0  0  0  0  0  0  0
   -3.2068   -2.1414    5.1985 C   0  0  0  0  0  0  0  0  0  0  0  0
    3.1004   -0.1266    5.0449 O   0  0  0  0  0  0  0  0  0  0  0  0
    3.1485    1.9569    3.0325 O   0  0  0  0  0  0  0  0  0  0  0  0
    4.1874   -0.9734    5.4236 C   0  0  0  0  0  0  0  0  0  0  0  0
    5.3728   -0.5614    4.7401 O   0  0  0  0  0  0  0  0  0  0  0  0
    5.7552    0.7910    4.9986 C   0  0  0  0  0  0  0  0  0  0  0  0
    6.0412    0.9623    6.4928 C   0  0  0  0  0  0  0  0  0  0  0  0
    4.7958    0.5659    7.2917 C   0  0  0  0  0  0  0  0  0  0  0  0
    4.4103   -0.8730    6.9348 C   0  0  0  0  0  0  0  0  0  0  0  0
    3.2077   -1.2290    7.6196 O   0  0  0  0  0  0  0  0  0  0  0  0
    7.1362    0.1247    6.8685 O   0  0  0  0  0  0  0  0  0  0  0  0
    7.0138    1.1277    4.1963 C   0  0  0  0  0  0  0  0  0  0  0  0
    5.0774    0.6526    8.6900 O   0  0  0  0  0  0  0  0  0  0  0  0
  1  2  1  0      
  2  3  1  0      
  3  4  2  0      
  4  5  1  0      
  5  6  1  0      
  6  1  1  0      
  2  7  1  0      
  7  8  1  0      
  8  9  1  0      
  9 10  1  0      
 10  3  1  0      
 10 11  2  0      
 11 12  1  0      
 12 13  1  0      
 13  4  1  0      
 14 15  1  0      
 15 16  2  0      
 17 11  1  0      
  5 18  1  0      
  2 19  1  0      
  7 20  1  0      
 15 21  1  0      
  9 16  1  0      
 12 22  1  0      
 23 13  1  0      
 22 24  1  0      
 24 25  1  0      
 25 26  1  0      
 26 27  1  0      
 27 28  1  0      
 28 29  1  0      
 29 24  1  0      
 29 30  1  0      
 27 31  1  0      
 26 32  1  0      
 28 33  1  0      
M  END
$$$$
