# Supplementary material for: Cyclodextrin Formulation of the Marine Natural Product Pseudopterosin A Uncovers Optimal Pharmacodynamics in Proliferation Studies of Human Umbilical Vein Endothelial Cells
Source: MDPI journal article supplement (doi:10.3390/md11093258), 2013-08-26
Supplement: s14 [file s14]

marinedrugs-11-03258-s007.mol
  ChemDraw12021317172D

 33 36  0  0  0  0  0  0  0  0999 V2000
   -1.9086    2.2135    0.0000 C   0  0  0  0  0  0  0  0  0  0  0  0
   -1.9086    1.3885    0.0000 C   0  0  0  0  0  0  0  0  0  0  0  0
   -1.1941    0.9760    0.0000 C   0  0  0  0  0  0  0  0  0  0  0  0
   -0.4797    1.3885    0.0000 C   0  0  0  0  0  0  0  0  0  0  0  0
   -0.4797    2.2135    0.0000 C   0  0  0  0  0  0  0  0  0  0  0  0
   -1.1941    2.6260    0.0000 C   0  0  0  0  0  0  0  0  0  0  0  0
   -2.6231    0.9760    0.0000 C   0  0  0  0  0  0  0  0  0  0  0  0
   -2.6231    0.1510    0.0000 C   0  0  0  0  0  0  0  0  0  0  0  0
   -1.9086   -0.2615    0.0000 C   0  0  0  0  0  0  0  0  0  0  0  0
   -1.1941    0.1510    0.0000 C   0  0  0  0  0  0  0  0  0  0  0  0
   -0.4797   -0.2615    0.0000 C   0  0  0  0  0  0  0  0  0  0  0  0
    0.2348    0.1510    0.0000 C   0  0  0  0  0  0  0  0  0  0  0  0
    0.2348    0.9760    0.0000 C   0  0  0  0  0  0  0  0  0  0  0  0
   -3.3375   -1.0865    0.0000 C   0  0  0  0  0  0  0  0  0  0  0  0
   -2.6231   -1.4990    0.0000 C   0  0  0  0  0  0  0  0  0  0  0  0
   -1.9086   -1.0865    0.0000 C   0  0  0  0  0  0  0  0  0  0  0  0
   -0.4797   -1.0865    0.0000 C   0  0  0  0  0  0  0  0  0  0  0  0
    0.2348    2.6260    0.0000 C   0  0  0  0  0  0  0  0  0  0  0  0
   -1.1941    1.8010    0.0000 H   0  0  0  0  0  0  0  0  0  0  0  0
   -3.3375    1.3885    0.0000 C   0  0  0  0  0  0  0  0  0  0  0  0
   -2.6231   -2.3240    0.0000 C   0  0  0  0  0  0  0  0  0  0  0  0
    0.9493   -0.2615    0.0000 O   0  0  0  0  0  0  0  0  0  0  0  0
    0.9493    1.3885    0.0000 O   0  0  0  0  0  0  0  0  0  0  0  0
    0.9493   -1.0865    0.0000 C   0  0  0  0  0  0  0  0  0  0  0  0
    1.3618   -1.8010    0.0000 O   0  0  0  0  0  0  0  0  0  0  0  0
    2.1599   -1.5919    0.0000 C   0  0  0  0  0  0  0  0  0  0  0  0
    2.9531   -1.8010    0.0000 C   0  0  0  0  0  0  0  0  0  0  0  0
    2.5407   -1.0865    0.0000 C   0  0  0  0  0  0  0  0  0  0  0  0
    1.7425   -1.2955    0.0000 C   0  0  0  0  0  0  0  0  0  0  0  0
    1.7425   -0.4705    0.0000 O   0  0  0  0  0  0  0  0  0  0  0  0
    2.9531   -2.6260    0.0000 O   0  0  0  0  0  0  0  0  0  0  0  0
    2.5724   -2.3064    0.0000 C   0  0  0  0  0  0  0  0  0  0  0  0
    3.3375   -1.3000    0.0000 O   0  0  0  0  0  0  0  0  0  0  0  0
  1  2  1  0      
  2  3  1  0      
  3  4  2  0      
  4  5  1  0      
  5  6  1  0      
  6  1  1  0      
  2  7  1  0      
  7  8  1  0      
  8  9  1  0      
  9 10  1  0      
 10  3  1  0      
 10 11  2  0      
 11 12  1  0      
 12 13  1  0      
 13  4  1  0      
 14 15  1  0      
 15 16  2  0      
 17 11  1  0      
  5 18  1  6      
  2 19  1  6      
  7 20  1  6      
 15 21  1  0      
  9 16  1  1      
 12 22  1  0      
 23 13  1  0      
 22 24  1  0      
 24 25  1  0      
 25 26  1  0      
 26 27  1  0      
 27 28  1  0      
 28 29  1  0      
 29 24  1  0      
 29 30  1  0      
 27 31  1  0      
 26 32  1  0      
 28 33  1  0      
M  END
